# Supplementary material
Source: publisher figshare collection journal article supplement (https://karger.figshare.com/ndownloader/files/23167331)
Supplement: Supplementary file 1 [file 23167331]

Supplement online 3: Outcomes in anterior circulation

|  | Unadjusted Analysis | | | PS-Matched Analysis | | |
| --- | --- | --- | --- | --- | --- | --- |
|  | Short  n= 243 | Long  n= 64 | P-Value | Short  n= 306 | Long  n= 337 | P-Value |
| **Primary outcome** | | | | | | |
| First-pass reperfusion | | | | | | |
| mTICI 3 | 69  (28.4%) | 19  (29.7%) | 0.839 | 88  (28.8%) | 91  (27.0%) | 0.620 |
| mTICI ≥2b | 111  (45.7%) | 27  (42.2%) | 0.617 | 137  (44.8%) | 133  (39.5%) | 0.162 |
| **Secondary outcome** | | | | | | |
| Final reperfusion | | | | | | |
| mTICI ≥2b | 206  (85.8%) | 57  (89.1%) | 0.384 | 258  (84.3%) | 314  (93.2%) | <0.001 |
| mTICI 3 | 103  (42.4%) | 31  (48.4%) | 0.399 | 128  (41.8%) | 148  (43.9%) | 0.593 |
| Number of passes, mean ± SD | 2.7 ± 2.2 | 2.8 ± 2.3 | 0.596 | 2.7 ± 2.2 | 2.8 ± 2.2 | 0.650 |
| Groin puncture – reperfusion (minutes), mean ± SD | 62.7 ± 41.6 | 71.8 ± 50.4 | 0.140 | 64.1 ± 42.6 | 79.6 ± 53.7 | <0.001 |
| Subarachnoid hemorrhage | 21  (8.6%) | 7  (10.9%) | 0.570 | 29  (9.5%) | 67  (19.9%) | <0.001 |
| **Clinical Outcome** | | | | | | |
| mRS score ≤ 2 at discharge | 71  (29.2%) | 7  (10.9%) | 0.003 | 86  (28.1%) | 28  (8.3%) | <0.001 |
| mRS score ≤ 2 at 90 days | 91/224  (40.6%) | 11/54  (20.4%) | 0.006 | 109/281  (38.8%) | 53/305  (17.4%) | <0.001 |

mRS: modified Rankin Scale; mTICI: modified thrombolysis in cerebral infarction; SD: standard deviation
